# Supplementary material for: Silica-based micro- and mesoporous catalysts for dry reforming of methane
Source: Royal Society of Chemistry journal article supplement (doi:10.1039/c8cy00622a), 2018-01-01
Supplement: c8cy00622a1.pdf [file c8cy00622a1.pdf]

## **Electronic Supplementary Information for**

### **Silica-based micro- and mesoporous catalysts for dry reforming of methane**

Ziwei Li, Sonali Das, Plaifa Hongmanorom, Nikita Dewangan, Ming Hui Wai and Sibudjing Kawi\*

Department of Chemical and Biomolecular Engineering, National University of Singapore, Singapore 117585, Singapore

Email: [chekawis@nus.edu.sg](mailto:chekawis@nus.edu.sg)

**Table S1** Microporous silica-based catalysts for DRM reaction

| Catalyst                                                          | Synthesis method                                | Catalytic performance |                 |                          | Carbon resistance                                                  | Reaction Conditions                                                                                                              | Reasons to performance                                                                                         | Metal Loading wt% | Ref |
|-------------------------------------------------------------------|-------------------------------------------------|-----------------------|-----------------|--------------------------|--------------------------------------------------------------------|----------------------------------------------------------------------------------------------------------------------------------|----------------------------------------------------------------------------------------------------------------|-------------------|-----|
|                                                                   |                                                 | CH <sub>4</sub>       | CO <sub>2</sub> | H <sub>2</sub> /CO Ratio |                                                                    |                                                                                                                                  |                                                                                                                |                   |     |
| Ni supported on silicalite-1 zeolite coated SiC foam (Ni/S-1/SiC) | Wet impregnation                                | 65                    | 40              | 1.3                      | Negligible after 30 h TOS                                          | 750 °C, GHSV = 15 L <sub>gcat</sub> <sup>-1</sup> h <sup>-1</sup> , CH <sub>4</sub> : CO <sub>2</sub> : O <sub>2</sub> = 8: 2: 3 | Strong MSI, small Ni particle size (4.5 nm after 100 h reaction) and high Ni dispersion                        | 14                | 38  |
| 10Ni/10MgO-β zeolite                                              | Wet impregnation                                | 90                    | 95              | 0.9                      | 2mg <sub>coke</sub> g <sub>cat</sub> <sup>-1</sup> h <sup>-1</sup> | 800 °C, GHSV = 60 L <sub>gcat</sub> <sup>-1</sup> h <sup>-1</sup> , CH <sub>4</sub> : CO <sub>2</sub> = 1: 1                     | Within 7 h, CH <sub>4</sub> and CO <sub>2</sub> conversions decreased by 10.5% and 8%, respectively            | 10                | 8   |
| Ni-ITQ-6                                                          | Incipient wet impregnation                      | 77                    | 90              | 1.39                     | 2.1% after 7 h                                                     | 700 °C, GHSV = 30 L <sub>gcat</sub> <sup>-1</sup> h <sup>-1</sup> , CH <sub>4</sub> : CO <sub>2</sub> = 1: 1                     | Side reactions including Boudouard reaction and steam reforming reaction lead to high H <sub>2</sub> /CO ratio | 5                 | 33  |
| Ni-ZSM-5                                                          | Wet impregnation                                | 95                    | 98              | 0.9                      | 1% after 30 h                                                      | 800 °C, GHSV = 12 L <sub>gcat</sub> <sup>-1</sup> h <sup>-1</sup> , CH <sub>4</sub> : CO <sub>2</sub> = 1: 1                     | Higher crystallization lead to higher catalytic performance                                                    | 5                 | 35  |
| 1Ni-2Co-ZSM-5                                                     | Wet impregnation                                | 60                    | 65              | 0.82                     | 5% after 12 h                                                      | 700 °C, GHSV = 60 L <sub>gcat</sub> <sup>-1</sup> h <sup>-1</sup> , CH <sub>4</sub> : CO <sub>2</sub> : N <sub>2</sub> = 1: 1: 3 | Synergistic effect between Ni and Co decreased carbon deposition                                               | 7                 | 36  |
| 1.5Ni-0.5Pt@Hollow silicalite-1                                   | Incipient wet impregnation and silicon leaching | 75                    | 82              | -                        | 1% after 6 h                                                       | 800 °C, GHSV = 72 L <sub>gcat</sub> <sup>-1</sup> h <sup>-1</sup> , CH <sub>4</sub> : CO <sub>2</sub> = 1: 1                     | Sintering of Ni outside shell occurred                                                                         | 1.5Ni-0.5Pt       | 37  |

**Table S2** Mesoporous silica-based catalysts

| Catalyst                  | Synthesis method                                              | Catalytic performance    |                          |                     | Carbon resistance     | Reaction Conditions                                                                                                              | Remarks                                                                                                                                             | Metal Loading wt% | Ref |
|---------------------------|---------------------------------------------------------------|--------------------------|--------------------------|---------------------|-----------------------|----------------------------------------------------------------------------------------------------------------------------------|-----------------------------------------------------------------------------------------------------------------------------------------------------|-------------------|-----|
|                           |                                                               | CH <sub>4</sub>          | CO <sub>2</sub>          | H <sub>2</sub> /C/O |                       |                                                                                                                                  |                                                                                                                                                     |                   |     |
| Ni based catalysts        |                                                               |                          |                          |                     |                       |                                                                                                                                  |                                                                                                                                                     |                   |     |
| Ni-SBA-15                 | Solid-state grinding                                          | 78                       | 86                       | 1.05                | 6.3% after 100 h      | 700 °C, GHSV = 22.5 L <sub>gcat</sub> <sup>-1</sup> h <sup>-1</sup> , CO <sub>2</sub> : CH <sub>4</sub> = 1: 1                   | Strong MSI, small Ni particle size (4.5 nm after 100 h reaction) and high Ni dispersion                                                             | 5                 | 40  |
| Ni-KIT-6                  |                                                               | 76                       | 85                       | 1.05                | 8.1% after 100 h      |                                                                                                                                  | Strong MSI, small Ni particle size (6.5 nm after 100 h reaction) and high Ni dispersion                                                             |                   |     |
| Ni-MCM-41                 |                                                               | decrease from 79% to 69% | decrease from 84% to 77% | 0.93                | 38.8% after 100 h     |                                                                                                                                  | Weak MSI, sintering of Ni, big Ni enwrapped by carbon nanotubes                                                                                     |                   |     |
| Ni-KIT-6                  | Impregnation                                                  | 40                       | 53                       | 0.9                 | -                     | 700 °C, GHSV = 60 L <sub>gcat</sub> <sup>-1</sup> h <sup>-1</sup> , N <sub>2</sub> : CO <sub>2</sub> : CH <sub>4</sub> =3: 1: 1  | Low Ni (0.5 wt%) loading lead to high dispersion but low DRM activity due to the low accessibility of Ni confined within the micropores of KIT-6    | 2                 | 66  |
| Ni-SBA-15                 | Impregnation (pretreated Ni precursor with (PEI))             | 87.5                     | 88                       | 0.92                | Negligible after 40 h | 750 °C, GHSV = 20 L <sub>gcat</sub> <sup>-1</sup> h <sup>-1</sup> , CO <sub>2</sub> : CH <sub>4</sub> : N <sub>2</sub> = 2: 2: 1 | NH <sub>2</sub> groups in PEI help Ni precursor bond to the silanol groups on surface of SBA-15 and inhibit their sintering due to steric hindrance | -                 | 55  |
| 5-Ni <sub>4</sub> /SBA-15 | Impregnation [Ni <sub>4</sub> O <sub>4</sub> ] cubane cluster | 65                       | -                        | 0.88                | 5.56%                 | 600 °C, GHSV = 36 L <sub>gcat</sub> <sup>-1</sup> h <sup>-1</sup> , CO <sub>2</sub> : CH <sub>4</sub> : N <sub>2</sub> = 1: 1: 8 | Small and highly dispersed NiO NPs                                                                                                                  | 1.67              | 56  |

|                                         |                                 |     |     |                    |                       |                                                                                                                |                                                                                                                                   |            |    |
|-----------------------------------------|---------------------------------|-----|-----|--------------------|-----------------------|----------------------------------------------------------------------------------------------------------------|-----------------------------------------------------------------------------------------------------------------------------------|------------|----|
| Ni/SBA-15                               | Impregnation with EG as solvent | 87  | 96  | 1.1                | Negligible after 20 h | 750 °C, GHSV = 7.5 L <sub>gcat</sub> <sup>-1</sup> h <sup>-1</sup> , CO <sub>2</sub> : CH <sub>4</sub> = 1: 1  | Interesting and effective method to prepare mesoporous silica confined catalysts                                                  | -          | 54 |
| Ni-hexagonal mesoporous silica          | One pot self-assembled method   | 76  | 84  | 0.8                | 5% after 100 h        | 700 °C, GHSV = 22.5 L <sub>gcat</sub> <sup>-1</sup> h <sup>-1</sup> , CO <sub>2</sub> : CH <sub>4</sub> = 1: 1 | Stable conversion within 100 h                                                                                                    | 7.5        | 67 |
| Ni based bimetallic catalyst            |                                 |     |     |                    |                       |                                                                                                                |                                                                                                                                   |            |    |
| Ni9Co1-SBA-15                           | Urea co-precipitation           | 60  | 73  | 1                  | Negligible after 50 h | 700 °C, GHSV = 72 L <sub>gcat</sub> <sup>-1</sup> h <sup>-1</sup> , CO <sub>2</sub> : CH <sub>4</sub> = 1: 1   | High metal dispersion (ca. 17–20%) and small metal particle sizes (ca.4–5 nm), synergetic effect of Co and Ni, confinement effect | 10         | 24 |
| 0.5Ru/12Co/SBA-15                       | Two-solvent impregnation        | 43  | 51  | 1.1                | -                     | 550 °C, GHSV = 67 L <sub>gcat</sub> <sup>-1</sup> h <sup>-1</sup> , CO <sub>2</sub> : CH <sub>4</sub> = 1: 1   | Ru addition enhanced the reducibility of Co species, stabilized Co from migration and increased active phases                     | 0.5Ru-12Co | 68 |
| Perovskite catalyst                     |                                 |     |     |                    |                       |                                                                                                                |                                                                                                                                   |            |    |
| LaNiO <sub>3</sub> -SBA-15              | Wet impregnation                | 75  | 67  | 1.05               | 4.5                   | 700 °C, GHSV = 36 L <sub>gcat</sub> <sup>-1</sup> h <sup>-1</sup> , CO <sub>2</sub> : CH <sub>4</sub> = 1: 1   | Stable structure restricted the agglomeration of Ni                                                                               | 10         | 48 |
| LaNiO <sub>3</sub> -MCM-41              | with metal citrate complex      | 77  | 66  | 1.0                | 4.8                   |                                                                                                                | MCM-41 structure collapsed after reaction leading to some Ni sintering                                                            |            |    |
| LaNiO <sub>3</sub> -SiO <sub>2</sub>    | precursors                      | 60  | 61  | 0.95               | 5.7                   |                                                                                                                | Carbon deposition leads to worse catalytic performance                                                                            |            |    |
| La <sub>2</sub> NiO <sub>4</sub> -KIT-6 | Sol-gel                         | 100 | 100 | 0.95               | 3.75% after 60 h      | 800 °C, GHSV = 33.6 L <sub>gcat</sub> <sup>-1</sup> h <sup>-1</sup> , CO <sub>2</sub> : CH <sub>4</sub> = 1: 1 | Stable cubic structure of KIT-6 and the formation of La <sub>2</sub> O <sub>3</sub> prevented Ni sintering                        | 10         | 69 |
| Ni based catalysts with promoters       |                                 |     |     |                    |                       |                                                                                                                |                                                                                                                                   |            |    |
| 3Sm-10Ni-                               | Two-solvent impregnation        | 70  | 75  | H <sub>2</sub> and | No peaks observed for | 700 °C, GHSV = 12 L <sub>gcat</sub> <sup>-1</sup> h <sup>-1</sup> , CO <sub>2</sub> : CH <sub>4</sub> =        | High oxygen storage capacity and redox potential of Sm <sub>2</sub> O <sub>3</sub> , improved Ni dispersion and MSI               | 10         | 71 |

|                    |                                              |                        |                        |                                               |                           |                                                                                                                                                                                       |                                                                                                                                                     |    |    |
|--------------------|----------------------------------------------|------------------------|------------------------|-----------------------------------------------|---------------------------|---------------------------------------------------------------------------------------------------------------------------------------------------------------------------------------|-----------------------------------------------------------------------------------------------------------------------------------------------------|----|----|
| SBA-15             |                                              |                        |                        | CO selectivity of 0.88 and 1.05, respectively | TPO after 5 h             | 1: 1                                                                                                                                                                                  |                                                                                                                                                     |    |    |
| 1Sm-10Ni-SBA-15    | Two-solvent impregnation                     | 56                     | 66                     | -                                             | 20% after 12 h            | 700 °C, GHSV = 12 L <sub>gcat</sub> <sup>-1</sup> h <sup>-1</sup> , CO <sub>2</sub> : CH <sub>4</sub> = 1: 1                                                                          | Small NiO size and high dispersion, the findings of opposite effects of Sm upon the catalytic performance of Ni-SBA-15 and Co-SBA-15 is interesting | 10 | 72 |
| Ni-AISBA-15        | Impregnation with ethylene glycol as solvent | 73                     | 80                     | 0.97                                          | 1.5% after 20 h           | 700 °C, GHSV = 18 L <sub>gcat</sub> <sup>-1</sup> h <sup>-1</sup> , CO <sub>2</sub> : CH <sub>4</sub> = 1: 1                                                                          | Ultra-small Ni size, high Hydrothermal stability, confinement effect of the mesoporous channels of AISBA-15                                         | 7  | 73 |
| 5Co-5Ni/5Sc-SBA-15 | Hydrothermal                                 | 74% to 65% within 50 h | 81% to 70% within 50 h | -                                             | 13% weight loss after 7 h | 700 °C, CO <sub>2</sub> : CH <sub>4</sub> : N <sub>2</sub> = 2.83:2.83:1, F/W = 133.33 mL <sub>gcat</sub> <sup>-1</sup> min <sup>-1</sup> , total flow rate = 40 mL min <sup>-1</sup> | Better dispersion of Co and Ni, strong MSI                                                                                                          | 10 | 26 |
| 3B-10Ni/SBA-15     | Sequential incipient wet impregnation        | 78                     | 80                     | 2.6                                           | 1.5% 800 °C               | 800 °C, CH <sub>4</sub> :H <sub>2</sub> O:CO <sub>2</sub> = 3:2:1                                                                                                                     | Enhancing interaction between the acidic B <sub>2</sub> O <sub>3</sub> and basic NiO phases                                                         | 10 | 74 |

|                         |                                                                |    |    |      |                                 |                                                                                                                                  |                                                                                                                                                                               |                       |    |
|-------------------------|----------------------------------------------------------------|----|----|------|---------------------------------|----------------------------------------------------------------------------------------------------------------------------------|-------------------------------------------------------------------------------------------------------------------------------------------------------------------------------|-----------------------|----|
| 1La-5Ni/SB A-15         | Incipient wet impregnation method with oleic acid as precursor | 83 | 86 | 0.92 | Negligible after 10 h at 700 °C | 700 °C, GHSV = 72 L <sub>gcat</sub> <sup>-1</sup> h <sup>-1</sup> , CO <sub>2</sub> : CH <sub>4</sub> : N <sub>2</sub> = 1: 1: 1 | Interesting synthesis method to achieve high Ni dispersion and sintering resistance                                                                                           | 5                     | 13 |
| 7La-6Ni/SB A-15         | Wet impregnation method                                        | 73 | 80 | 0.8  | -                               | 750 °C, GHSV = 20 L <sub>gcat</sub> <sup>-1</sup> h <sup>-1</sup> , CO <sub>2</sub> : CH <sub>4</sub> : N <sub>2</sub> = 1: 1: 3 | Highly dispersed La promotes generation of small Ni and CO <sub>2</sub> dissociation into oxygen atom, facilitating the formation of different C1 intermediates on Ni surface | 6                     | 76 |
| 20LaNi-SBA              | In situ auto-combustion                                        | 48 | 60 | 0.61 | Carbon balance 91%              | 600 °C, GHSV = 600 L <sub>gcat</sub> <sup>-1</sup> h <sup>-1</sup> , CO <sub>2</sub> : CH <sub>4</sub> = 1: 1                    | smaller CH <sub>4</sub> activation energy of 64.7 kJmol <sup>-1</sup> due to small Ni size of 3 nm                                                                            | 20La NiO <sub>3</sub> | 52 |
| 10Ni-8Mg-SBA-15         | Incipient wetness impregnation                                 | 67 | 57 | -    | -                               | 700 °C, GHSV = 36 L <sub>gcat</sub> <sup>-1</sup> h <sup>-1</sup> , CO <sub>2</sub> : CH <sub>4</sub> = 1: 1                     | Mg incorporation promoted Ni dispersion and basic properties of SBA-15 via metal-support interaction, inhibiting carbon formation                                             | 10                    | 70 |
| 10Ni-8MgO-coated SBA-15 | One pot hydrothermal and wet impregnation                      | 73 | 65 | 1.0  | 6% after 40 h                   | 700 °C, GHSV = 36 L <sub>gcat</sub> <sup>-1</sup> h <sup>-1</sup> , CO <sub>2</sub> : CH <sub>4</sub> = 1: 1                     | Better order in the meso-structure and more medium basic sites were formed, enhanced Ni dispersion and improved catalytic performance and carbon resistance.                  | 10                    | 47 |
| NiCe/SBA-16             | Incipient wetness impregnation                                 | 72 | 77 | 0.72 | 3.8% after 100 h                | 700 °C, GHSV = 45 L <sub>gcat</sub> <sup>-1</sup> h <sup>-1</sup> , CO <sub>2</sub> : CH <sub>4</sub> : He = 1: 1: 1             | CeO <sub>2</sub> confinement effect of stable cage-like pores                                                                                                                 | 5                     | 43 |
| 2Ni-1Zr-MCM-41          | One pot hydrothermal                                           | 92 | -  | 0.98 | 6% after 72 h                   | 750 °C, GHSV = 45 L <sub>gcat</sub> <sup>-1</sup> h <sup>-1</sup> , CO <sub>2</sub> : CH <sub>4</sub> : He = 1: 1: 1             | Addition of Zr <sup>4+</sup> enhanced the structural stability, increased Ni dispersion, partial activation of CO <sub>2</sub>                                                | 2                     | 50 |
| 9Y-9Ni-SBA-15           | Sol-gel                                                        | 85 | 90 | 0.9  | 1.2% after 50 h                 | 700 °C, GHSV = 24 L <sub>gcat</sub> <sup>-1</sup> h <sup>-1</sup> , CO <sub>2</sub> : CH <sub>4</sub> = 1: 1: 1                  | Stable conversions of CH <sub>4</sub> and CO <sub>2</sub> within 50 h TOS with a 6% and 4% decrease, respectively                                                             | 9                     | 75 |

**Table S3** SiO<sub>2</sub>-based catalysts for DRM reaction

| Catalyst                                                     | Synthesis method               | Catalytic performance |                 |                    | Carbon resistance                                              | Reaction Conditions                                                                                                              | Remarks                                                                                                                                                                                          | Metal Loading wt% | Ref |
|--------------------------------------------------------------|--------------------------------|-----------------------|-----------------|--------------------|----------------------------------------------------------------|----------------------------------------------------------------------------------------------------------------------------------|--------------------------------------------------------------------------------------------------------------------------------------------------------------------------------------------------|-------------------|-----|
|                                                              |                                | CH <sub>4</sub>       | CO <sub>2</sub> | H <sub>2</sub> /CO |                                                                |                                                                                                                                  |                                                                                                                                                                                                  |                   |     |
| Ni/SiO <sub>2</sub> (OAm)                                    | Incipient wetness impregnation | 70                    | 75              | 0.95               | 17 h & negligible carbon formation on Ni/SiO <sub>2</sub> OAmc | 700 °C<br>GHSV = 72 L g <sub>cat</sub> <sup>-1</sup> h <sup>-1</sup>                                                             | A stronger steric hindrance is given by the more complex aliphatic chain network of the pair, retarding the growth of Ni particle.                                                               | 5                 | 53  |
| Ni/SiO <sub>2</sub> (OAc)                                    |                                | 32                    | 40              | 0.8                |                                                                |                                                                                                                                  |                                                                                                                                                                                                  |                   |     |
| Ni/SiO <sub>2</sub> (OAmc)                                   |                                | 12                    | 25              | 0.5                |                                                                |                                                                                                                                  |                                                                                                                                                                                                  |                   |     |
| Ni-Cu/SiO <sub>2</sub>                                       | Wetness Impregnation           | 90                    | 90              | -                  | 140 h                                                          | -                                                                                                                                | The addition of Cu into Ni fine-tuned the catalytic activity by balancing the CH <sub>4</sub> cracking and coke oxidation by CO <sub>2</sub>                                                     | 8Ni-1Cu           | 82  |
| Ni-Cu/SiO <sub>2</sub>                                       | Incipient Wetness impregnation | 60                    | 70              | 0.9                | 30 h & 8% carbon formation                                     | 700 °C<br>GHSV = 16 Lh <sup>-1</sup> ,<br>CH <sub>4</sub> :CO <sub>2</sub> :He = 1:1:8                                           | Strong metal-support interaction and the well dispersed small metal-nanoparticles                                                                                                                | 5.5Cu-20.9Ni      | 83  |
| NiFe <sub>2</sub> O <sub>4</sub> Spinel/<br>SiO <sub>2</sub> | Sol-Gel Hydrothermal           | 66                    | 93              | 1.1                | -                                                              | 800 °C,<br>GHSV=54 Lh <sup>-1</sup> ,<br>CH <sub>4</sub> :CO <sub>2</sub> : He =2:1:6                                            | NiFe <sub>2</sub> O <sub>4</sub> on silica has more acidic properties provides a more active and selective catalyst that seems less prone to coking.                                             | 10                | 84  |
| NiFe <sub>2</sub> O <sub>4</sub> /SiO <sub>2</sub>           | Modified hydrothermal          | 80                    | 72              | 0.88               | 60 h and 7.24 mg carbon. g <sub>cat</sub> <sup>-1</sup>        | 200 W (Plasma assisted)<br>CH <sub>4</sub> : CO <sub>2</sub> = 1: 1<br>GHSV = 12 Lg <sub>cat</sub> <sup>-1</sup> h <sup>-1</sup> | The special structure of the as-synthesized NiFe <sub>2</sub> O <sub>4</sub> #SiO <sub>2</sub> catalyst prevented the carbon formation in the process and restrained aggregation of Ni-Fe alloy. | Ni/Fe = 0.5       | 85  |

|                                                             |                                                     |    |    |      |                                                             |                                                                                                                                                        |                                                                                                                                                                              |                  |    |
|-------------------------------------------------------------|-----------------------------------------------------|----|----|------|-------------------------------------------------------------|--------------------------------------------------------------------------------------------------------------------------------------------------------|------------------------------------------------------------------------------------------------------------------------------------------------------------------------------|------------------|----|
| Fe-Ni/MgAl <sub>2</sub> O <sub>4</sub>                      | co-precipitation and incipient wetness impregnation | 51 | -  | -    | -                                                           | 800 °C<br>CH <sub>4</sub> : CO <sub>2</sub> = 1: 1<br>W <sub>cat</sub> /F <sub>CH<sub>4</sub></sub> = 0.40–0.71 kg <sub>cat</sub> smol <sup>-1</sup> ) | The Fe-Ni alloy is the active phase where Fe segregates to form FeOx. It reduces the surface carbon accumulation through interaction with FeOx lattice oxygen, producing CO. | 8Ni-5Fe          | 87 |
| Ni-Co/SiO <sub>2</sub>                                      | Incipient wetness impregnation                      | 80 | 82 | -    | 30 h & 0 mg carbon/mg <sub>cat</sub> h                      | 700 °C, CH <sub>4</sub> : CO <sub>2</sub> = 1: 1, GHSV= 72Lg <sub>cat</sub> <sup>-1</sup> h <sup>-1</sup>                                              | Ni-Co are uniformly distributed and thus led to strong metal support interaction                                                                                             | 4Ni-1Co          | 88 |
| Ni/SiO <sub>2</sub>                                         | on using oleic acid                                 | 75 | 78 | -    | 30 h & 0 mg carbon/mg <sub>cat</sub> h                      |                                                                                                                                                        | -                                                                                                                                                                            | 5                |    |
| Co/SiO <sub>2</sub>                                         | and oleylamine                                      | 30 | 30 | -    | 30 h & 0 mg carbon/mg <sub>cat</sub> h                      |                                                                                                                                                        | -                                                                                                                                                                            | 5                |    |
| Ni-Co/SiO <sub>2</sub> derived from phyllosilicates         | One pot hydrothermal method                         | 85 | 90 | 0.85 | 100 h & Negligible coke formation                           | 750 °C<br>CH <sub>4</sub> : CO <sub>2</sub> =1: 1<br>GHSV = 60000 mLg <sub>cat</sub> <sup>-1</sup> h <sup>-1</sup>                                     | Addition of Co enhanced metal support interaction and thus prevented carbon formation for 100 h operation                                                                    | 7Ni-3Co          | 89 |
| Co-Ru-Zr/ SiO <sub>2</sub>                                  | Wetness impregnation                                | 70 | 83 | 0.82 | -                                                           | 700 °C, CH <sub>4</sub> : CO <sub>2</sub> =1:1, GHSV=20L g <sub>cat</sub> <sup>-1</sup> h <sup>-1</sup>                                                | An appropriate support and amount of Ru played crucial role in activity and stability of the catalyst                                                                        | 0.4Ru            | 90 |
| Co-Ru-Zr/γ-Al <sub>2</sub> O <sub>3</sub>                   |                                                     | 81 | 90 | 0.92 | -                                                           |                                                                                                                                                        |                                                                                                                                                                              |                  |    |
| Co-Ru-Zr/ MgO                                               |                                                     | 59 | 71 | 0.76 | -                                                           |                                                                                                                                                        |                                                                                                                                                                              |                  |    |
| Sn, Ce, Mn, Co promoted Ni <sub>x</sub> Mg <sub>1-x</sub> O | A bottom up approach                                | 75 | 85 | 0.9  | 100 h & 26.65% coke deposition                              | 750 °C, CH <sub>4</sub> :CO <sub>2</sub> =1: 1, GHSV= 20L g <sub>cat</sub> <sup>-1</sup> h <sup>-1</sup>                                               | Distribution of promoters in crucial to enhance the performance of the catalyst.                                                                                             | 1promoters-10 Ni | 91 |
| Sn modified Ni/Al <sub>2</sub> O <sub>3</sub>               | Co-impregnation method                              | 60 | -  | -    | 8 h & 17 mg g <sub>cat</sub> <sup>-1</sup> .h <sup>-1</sup> | 800 °C<br>CH <sub>4</sub> : CO <sub>2</sub> =1: 1<br>GHSV = 72 mL g <sub>cat</sub> <sup>-1</sup> h <sup>-1</sup>                                       | Sn <sup>4+</sup> enriched the NiO particle surface and facilitated the formation of Ni-Sn alloy and increased the reducibility of NiAl <sub>2</sub> O <sub>4</sub>           | 11.3 Ni-0.45Sn   | 92 |



|                                                             |                                          |    |    |      |                                                             |                                                                                                                                               |                                                                                                                       |                                 |    |
|-------------------------------------------------------------|------------------------------------------|----|----|------|-------------------------------------------------------------|-----------------------------------------------------------------------------------------------------------------------------------------------|-----------------------------------------------------------------------------------------------------------------------|---------------------------------|----|
| Sn doped Ni/SiO <sub>2</sub>                                | Wetness impregnation                     | -  | -  | 0.4  | 25 h & 1.8 mol <sub>carbon</sub> /mol <sub>Ni</sub>         | 500 °C, CH <sub>4</sub> : CO <sub>2</sub> =2.3: 1.8<br>GHSV=6000 mol <sub>reactant</sub> ·h <sup>-1</sup> ·mol <sup>-1</sup> <sub>totNi</sub> | Addition of Sn showed to have negative effect on Ni atoms decreasing 3-4-fold the intrinsic activity                  | 0.87Ni-0.014Sn                  | 93 |
| Ni-In/SiO <sub>2</sub>                                      | Deposition - precipitation method        | 30 | 78 | 0.73 | -                                                           | 675 °C<br>CH <sub>4</sub> : CO <sub>2</sub> = 2.3: 1                                                                                          | Indium atom dilute the surface of the nickel forming multiple bonded carbon species and thus prevent carbon formation | 3Ni-2In                         | 94 |
| Ni/α-Al <sub>2</sub> O <sub>3</sub>                         | Co - impregnation                        | 62 | 78 | -    | 45 (mg <sub>coke</sub> g <sub>cat</sub> ·h <sup>-1</sup> )  | 800 °C<br>CH <sub>4</sub> :CO <sub>2</sub> =1: 1<br>GHSV = 60L g <sub>cat</sub> <sup>-1</sup> h <sup>-1</sup>                                 | Sn increased the dispersion of Ni, retarded sintering of Ni thus retarding the coke formation                         | 0.02Sn-10 Ni                    | 95 |
| Sn0.02Ni/α-Al <sub>2</sub> O <sub>3</sub>                   |                                          | 38 | 58 | -    | 0(mg <sub>coke</sub> g <sub>cat</sub> ·h <sup>-1</sup> )    |                                                                                                                                               |                                                                                                                       |                                 |    |
| One step Ni on Al (OsNiAl)                                  | Solvothermal and sequential impregnation | 98 | 98 | 1    | Weight loss is observed in different regions of temperature | 700 °C<br>GHSV = 5000–50000 mLg <sub>cat</sub> <sup>-1</sup> h <sup>-1</sup><br>CH <sub>4</sub> : CO <sub>2</sub> =1: 1                       | Catalysts with more acidic or basic surfaces were found to be more prone to deactivation and metal sintering.         | -                               | 96 |
| One step Ni on Si (OsNiSi)                                  |                                          | 98 | 99 | 0.6  |                                                             |                                                                                                                                               |                                                                                                                       |                                 |    |
| Two step Ni on Al (TsNiSi)                                  |                                          | 90 | 90 | 0.65 |                                                             |                                                                                                                                               |                                                                                                                       |                                 |    |
| Two step Ni on Al (TsNiAl)                                  |                                          | 25 | 25 | 0.82 |                                                             |                                                                                                                                               |                                                                                                                       |                                 |    |
| Ni-phyllsilicate structure derived Ni-SiO <sub>2</sub> -MgO | Ammonia Evaporation method               | 80 | 62 | 2.0  | 135 h /Small amount of coke formation                       | 750 °C,<br>GHSV=100 Lg <sub>cat</sub> <sup>-1</sup> h <sup>-1</sup> ,<br>CH <sub>4</sub> :CO <sub>2</sub> :H <sub>2</sub> O =2:1:2            | enhanced basicity strength, reasonable moderate acidity strength and structural stability                             | 15Ni-30-SiO <sub>2</sub> -55MgO | 97 |

|                                                     |                                              |    |    |      |                                                   |                                                                                                                                                |                                                                                                                                                                                     |                         |     |
|-----------------------------------------------------|----------------------------------------------|----|----|------|---------------------------------------------------|------------------------------------------------------------------------------------------------------------------------------------------------|-------------------------------------------------------------------------------------------------------------------------------------------------------------------------------------|-------------------------|-----|
| Ni supported on Silica/Ceria-Zirconia particles     | Flame spray pyrolysis (FSP)                  | 80 | -  | 1.0  | 24 h / 0.5 g <sub>carbon</sub> /g <sub>cat</sub>  | 700 °C<br>WHSV = 144 L <sub>g<sub>cat</sub></sub> <sup>-1</sup> h <sup>-1</sup><br>CH <sub>4</sub> : CO <sub>2</sub> = 1: 1                    | Introducing silica to the ceria-zirconia enabled the mixed supports to outperform the neat ceria-zirconia by decreasing susceptibility toward the RWGS and preventing deactivation. | 10-Si/CeZr ratio of 2:1 | 98  |
| Ni immobilized (NPs) Ce-mesoporous SiO <sub>2</sub> | sublimation-deposition strategy              | 90 | 98 | 1.2  | 20 h & Negligible coke formation                  | 750 °C<br>GHSV=6 L <sub>g<sub>cat</sub></sub> <sup>-1</sup> h <sup>-1</sup>                                                                    | The confinement effect deriving from the mesoporous channels of silica support, as well as the high dispersion and reducibility of Ni NPs.                                          | 10.1                    | 99  |
| Rh/CaO-SiO <sub>2</sub>                             | Incipient wetness impregnation               | 46 | -  | 0.88 | -                                                 | 550 °C<br>CH <sub>4</sub> : CO <sub>2</sub> = 1: 1<br>W/F = 2.67 × 10 <sup>-5</sup> g h mL <sup>-1</sup>                                       | The incorporation of CaO increased metal dispersion                                                                                                                                 | 8                       | 100 |
| Ni-La <sub>2</sub> O <sub>3</sub> /SiO <sub>2</sub> | Wetness impregnation using oleic acid        | 80 | 85 | 0.8  | 100 h and small amount of coke formation          | 700 °C<br>CH <sub>4</sub> : CO <sub>2</sub> = 1: 1<br>GHSV = 72 L <sub>g<sub>cat</sub></sub> <sup>-1</sup> h <sup>-1</sup>                     | The addition of La <sub>2</sub> O <sub>3</sub> enhanced the interaction between NiO and the silica support to form a more stable nickel silicate.                                   | 10                      | 19  |
| Ni-La <sub>2</sub> O <sub>3</sub> /SiO <sub>2</sub> | Poly(ethylene glycol)-assisted sol-gel route | 98 | 98 | 1.04 | 40 h & coke deposition = 236 mg /g <sub>cat</sub> | 800 °C<br>CH <sub>4</sub> : CO <sub>2</sub> = 1: 1<br>GHSV = 2.4 × 10 <sup>4</sup> mL <sub>g<sub>cat</sub></sub> <sup>-1</sup> h <sup>-1</sup> | The presence of La significantly inhibited the reverse water gas shift reaction, resulting in a H <sub>2</sub> /CO ratio close to unity.                                            | 17.5                    | 101 |
| Alumina coated Ni nanoparticle                      | Atomic layer deposition                      | 80 | -  | -    | -                                                 | 700 °C<br>GHSV = 3600 L <sub>g<sub>cat</sub></sub> <sup>-1</sup> h <sup>-1</sup><br>CH <sub>4</sub> : CO <sub>2</sub> = 1: 1                   | The formation of alumina coating strongly inhibits catalyst sintering thus significantly increases the activity and stability of the NiO-5 catalyst.                                | 5                       | 105 |

|                             |                                           |      |      |      |                                  |                                                                                                                                                      |                                                                                                                                                                                                                                            |                            |     |
|-----------------------------|-------------------------------------------|------|------|------|----------------------------------|------------------------------------------------------------------------------------------------------------------------------------------------------|--------------------------------------------------------------------------------------------------------------------------------------------------------------------------------------------------------------------------------------------|----------------------------|-----|
| TiO <sub>2</sub> coated Ni  | Atomic layer deposition                   | 58.6 | 62.6 | 0.72 | -                                | 800 °C<br>CH <sub>4</sub> : CO <sub>2</sub> = 1:1<br>GHSV = 12 L <sub>g<sub>cat</sub></sub> <sup>-1</sup> h <sup>-1</sup>                            | The TiO <sub>2</sub> layer facilitated the formation of separate carbon filaments rather than the graphitic layer on the Ni, reducing the possibility of the deposited carbon layers to cover and poison the Ni active sites of catalysts. | -                          | 106 |
| Ni@yolk-ZrO <sub>2</sub>    | Reverse Micelle                           | 90   | -    | -    | 50 h & No coke formation         | 750 °C<br>GHSV = 50400 mL <sub>g<sub>cat</sub></sub> <sup>-1</sup> h <sup>-1</sup>                                                                   | Amount of micropores in ZrO <sub>2</sub> hollow shells and the surfactant addition directly affected the physical properties of the ZrO <sub>2</sub> hollow shell                                                                          | 13.45                      | 107 |
| Ni-Yolk@Ni@SiO <sub>2</sub> | microemulsion                             | 90   | 95   | 0.81 | 90 h & negligible coke formation | 800 °C<br>GHSV = 36000 mL <sub>g<sub>cat</sub></sub> <sup>-1</sup> h <sup>-1</sup><br>CH <sub>4</sub> : CO <sub>2</sub> = 1: 1                       | Highly dispersed Ni nanoparticles in the shell and core imparts dual effects of formation of small satellite Ni particles due to strong Ni-SiO <sub>2</sub> interactions.                                                                  | 18.68                      | 15  |
| Ni@Ni-<br>phyllosilicate    | Mg<br>Hydrothermal                        | 78   | 81   | 0.98 | 90 h & negligible coke formation | 700 °C<br>GHSV = 1440 L <sub>g<sub>cat</sub></sub> <sup>-1</sup> h <sup>-1</sup><br>CH <sub>4</sub> : CO <sub>2</sub> = 1: 1                         | Higher nickel dispersion, strong basicity due to the presence of Mg which prevents carbon deposition by reverse disproportionation                                                                                                         | 6.3Ni-<br>21.6Si-<br>7.8Mg | 110 |
| Ni@SiO <sub>2</sub>         | Immobilization Ni nanoparticles on silica | 42   | 64   | 0.70 | 160 h & no carbon deposition     | 800 °C<br>GHSV = 19000 mL <sub>g<sub>cat</sub></sub> <sup>-1</sup> min <sup>-1</sup><br>CH <sub>4</sub> : CO <sub>2</sub> : N <sub>2</sub> = 9: 9: 2 | The over-layer of silica as compared to normal supported catalyst allowed the facile mass transfer of the reactants and products.                                                                                                          | 10.5                       | 108 |

|                                                  |                                                              |      |      |      |                                                                           |                                                                                                                      |                                                                                                                                                                 |                       |     |
|--------------------------------------------------|--------------------------------------------------------------|------|------|------|---------------------------------------------------------------------------|----------------------------------------------------------------------------------------------------------------------|-----------------------------------------------------------------------------------------------------------------------------------------------------------------|-----------------------|-----|
| Ru-Co@SiO <sub>2</sub> - PVP                     | Hydrothermal (or impregnation) and modified Stöber processes | 74   | 85   | 0.98 | 10h/0.5 mg <sub>coke</sub> g <sub>cat</sub> <sup>-1</sup> h <sup>-1</sup> | 700 °C<br>CH <sub>4</sub> : CO <sub>2</sub> = 1: 1<br>GHSV = 54000 mL g <sub>cat</sub> <sup>-1</sup> h <sup>-1</sup> | Uniform Ru distribution through a hydrothermal approach resulted in more direct Co-Ru interaction, making Co-based cores rather coking- and oxidation-resistant | 1.2Ru-82.2 Co         | 111 |
| Ru-Co@SiO <sub>2</sub> - CTAB                    |                                                              | 71.3 | 77   | 0.91 |                                                                           |                                                                                                                      |                                                                                                                                                                 |                       |     |
| Ru-Co@SiO <sub>2</sub> -No surfactant            |                                                              | 66.3 | 76.2 | 0.81 |                                                                           |                                                                                                                      |                                                                                                                                                                 |                       |     |
| NiCo@SiO <sub>2</sub>                            | Micro-emulsion method                                        | 87.2 | 88.9 | -    | 50 h & Negligible coke formation                                          | 800 °C<br>CH <sub>4</sub> : CO <sub>2</sub> = 1: 1<br>GHSV = 300 mL g <sub>cat</sub> <sup>-1</sup> h <sup>-1</sup>   | The encapsulation of metal nanoparticles by SiO <sub>2</sub> shell could effectively inhibit the agglomeration of active sites.                                 | 10                    | 112 |
| Cu-Ni@SiO <sub>2</sub>                           | Micro-emulsion                                               | 75   | -    | 0.9  | 18 h & negligible coke formation                                          | 700 °C<br>GHSV = 13.33 L g <sub>cat</sub> <sup>-1</sup> h <sup>-1</sup><br>CH <sub>4</sub> : CO <sub>2</sub> = 1: 1  | proper percentage of Cu improved the performance and stability.                                                                                                 | 1Cu-2.4 Ni            | 114 |
| Multiple core@shell                              | One -pot reverse phase microemulsion                         | 90   | 90   | -    | 100 h & negligible coke formation                                         | 800 °C<br>GHSV = 18000 mL g <sub>cat</sub> <sup>-1</sup> h <sup>-1</sup><br>CH <sub>4</sub> : CO <sub>2</sub> = 1: 1 | Ultra-small Ni nanoparticles (4.3 nm) and confinement effect between metal and support.                                                                         | 4.93                  | 115 |
| Sandwich-Like Silica@Ni@Silica Multicore-Shell   | Ammonia evaporation                                          | 50   | 60   | 0.75 | 24 h & 7.6 % coke formation                                               | 800 °C<br>GHSV = 60 000 mLg <sub>cat</sub> <sup>-1</sup> h <sup>-1</sup>                                             | The thickness of the shell was varied by amount of TEOS and catalyst prepared by 0.4 ml TEOS showed higher activity.                                            | 3.5                   | 117 |
| Ni-Mg phyllosilicate nanotubes@ SiO <sub>2</sub> | Hydrothermal                                                 | 86   | 90   | 0.8  | 75 h & no coke formation                                                  | 750 °C GHSV = 60 L g <sub>cat</sub> <sup>-1</sup> h <sup>-1</sup><br>CH <sub>4</sub> : CO <sub>2</sub> = 1: 1        | confinement effect conferred by stable mesoporous silica shell.                                                                                                 | 11.6-Ni-9.2 Mg-33.6Si | 118 |
